# Supplementary material for: Cellular senescence drives age-dependent hepatic steatosis
Source: PubMed Central journal article supplement (PMC5474745; doi:10.1038/ncomms15691), 2017-06-13
Supplement: ncomms15691-s1.pdf [file ncomms15691-s1.pdf]

**a**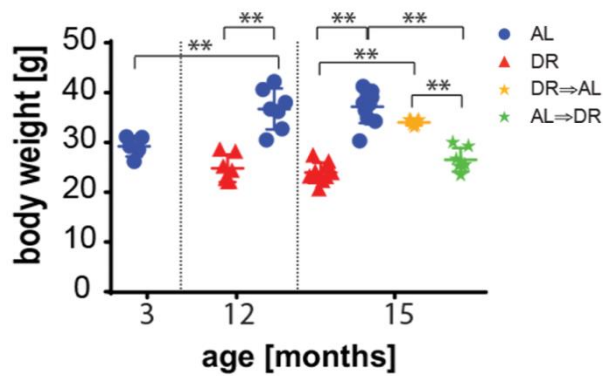**b**

| group  | Case No  | Grade of steatosis |
|--------|----------|--------------------|
| 15m AL | 2746 NN  | 1                  |
| 15m AL | 2746 BN  | 1                  |
| 15m AL | 2638 2LN | 3                  |
| 15m AL | 2638 2RN | 3                  |
| 12m AL | 2640 RN  | 0                  |
| 12m AL | 2640 BN  | 1                  |
| 12m AL | 2640 LN  | 2                  |
| 12m AL | 2635 NN  | 2                  |
| 12m DR | 2629 RN  | 0                  |
| 12m DR | 2629 2RN | 0                  |
| 12m DR | 2629 BN  | 0                  |
| 12m DR | 2629 LN  | 0                  |
| 15m DR | 2633 BN  | 0                  |
| 15m DR | 2633 2LN | 1                  |
| 15m DR | 2633 LN  | 0                  |
| 15m DR | 2642 3W  | 0                  |

### Supplementary Figure 1:

**a)** Body weights of mice in all experimental groups. **b)** Steatosis scoring on H&E stained mouse liver sections at 12m and 15m of age (scores: 0 <5%, 1 = 5-33%, 2 = 34-66%, 3 = 67-100%).

Data per animal (dots) and means  $\pm$  SD are shown. Mouse numbers for body weights are AL3m: n=5; AL/DR12m: n=7; AL/DR15m: n=10, crossover: n=7. Significant differences (ONE WAY ANOVA) are indicated with \*  $P \leq 0.05$  and \*\*  $P \leq 0.001$ .

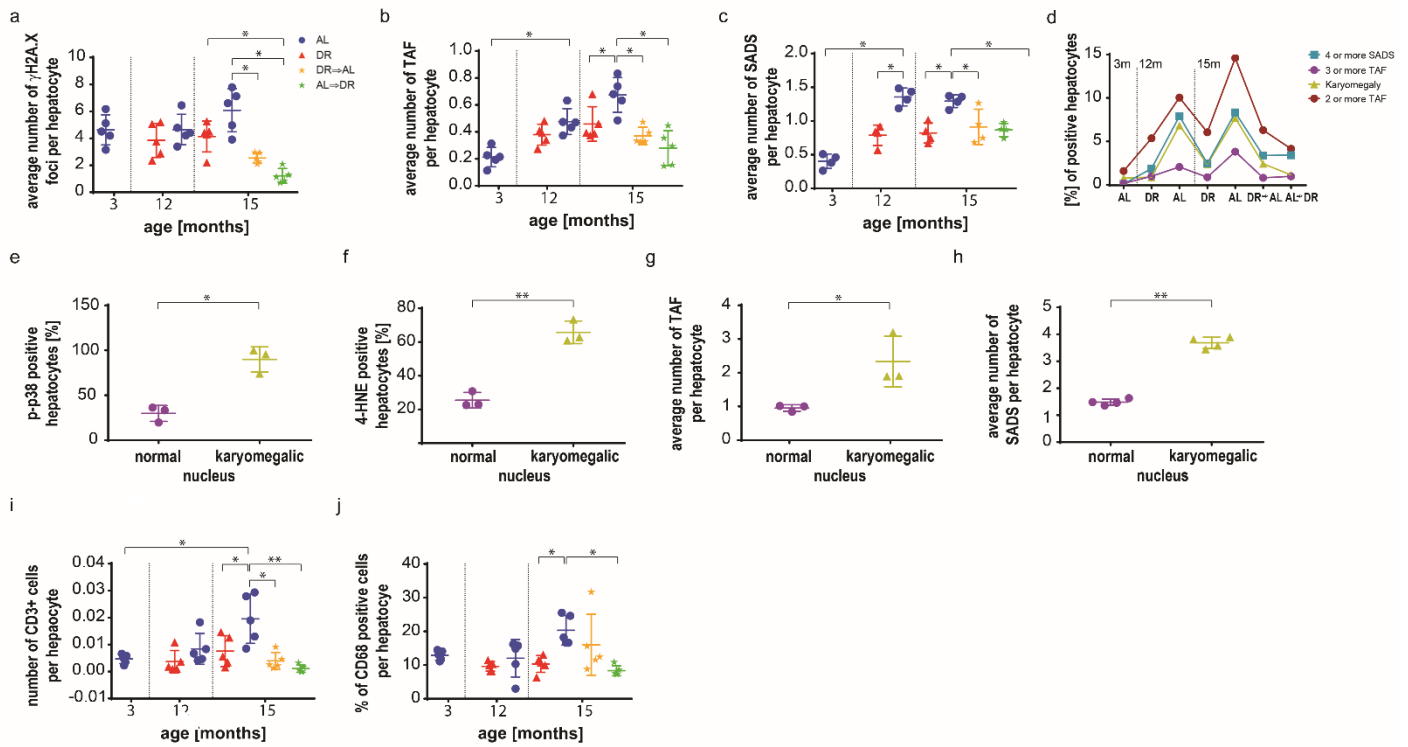

## Supplementary Figure 2: Further markers of cell senescence in mouse livers

**a)** Average numbers of  $\gamma$ -H2A.X foci per hepatocyte (n=5). **b)** Average numbers of TAF per hepatocyte (n=5). **c)** Average numbers of SADS per hepatocyte (n=4). **d)** Plots of multiple senescence markers (percentage of karyomegalic hepatocytes, hepatocytes with  $\geq 2$  and  $\geq 3$  TAF or with  $\geq 4$  SADS) over all experimental groups show similar patterns. **e) - h)** Hepatocytes were separated into 'normal' (nuclear cross-sectional area  $< 127 \mu\text{m}^2$ ) and 'karyomegalic' (nuclear cross-sectional area  $\geq 127 \mu\text{m}^2$ ) **e)** frequencies of p38-positive cells in both groups (n=3), **f)** frequencies of 4-HNE positive hepatocytes (n=3), **g)** average numbers of TAF per hepatocyte nucleus (n=3), **h)** average numbers of SADS per hepatocyte nucleus (n=3), **i)** frequency of CD3+ cells per hepatocyte (n=5), **j)** frequency of CD68+ cells per hepatocyte (n=5).

Data per animal (dots) and means  $\pm$  SD are shown. Significant differences (ONE WAY ANOVA, ttest) are indicated with \*  $P \leq 0.05$  and \*\*  $P \leq 0.001$ .

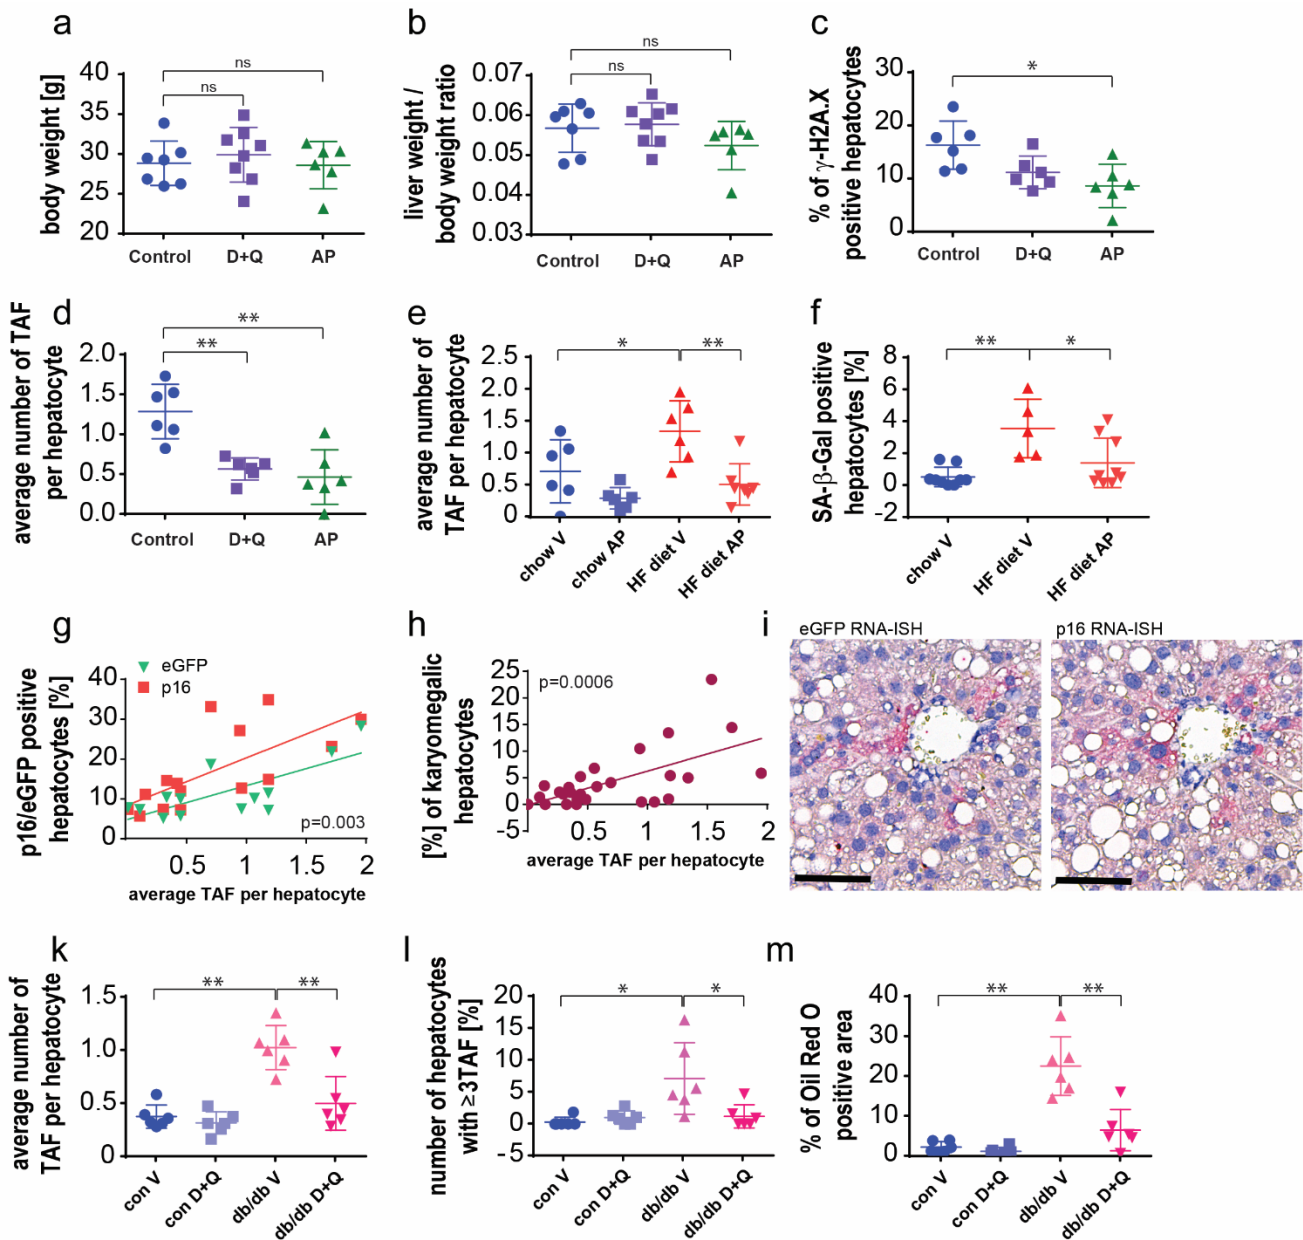

### Supplementary Figure 3: Senescence marker after AP and senolytic treatment in old, high fat fed and db/db mice

**a-d)** 27 months old INK-ATTAK mice show no differences in **a)** body weight (n=6-8) and **b)** liver/body weight ratio (n=6-8). **c)** Percentages of  $\gamma$ -H2A.X positive hepatocytes (n=6) and **d)** average numbers of TAF per hepatocyte decrease significantly after treatment with AP and senolytic drugs (n=6). **e-i)** 15 months old INK-ATTAK mice under standard chow or high fat diet. **e)** Average number of TAF per hepatocyte (n=6) and **f)** number of SA- $\beta$ -Gal positive hepatocytes increase in animals on high fat feeding and decrease significantly after treatment with AP (n=5-10). **g), h)** Showing correlations positive between the average number of TAF per hepatocyte with senescent markers p16/eGFP and karyomegaly. **i)** Representative images of RNA-ISH staining for p16 and eGFP on adjacent sections shows positive cells in the same area (red/pink = p16/eGFP, blue = haematoxylin, scale bar 50 $\mu$ m). **k-m)** db/db mice **k)** Average number of TAF per hepatocyte (n=6), **l)** % of TAF<sup>+</sup> hepatocytes (n=6) and **m)** % of Oil Red O positive area are significantly increased in db/db animals and decreased significantly after treatment with senolytic drugs (n=6).

Data per animal (dots) and means  $\pm$  SD are shown. Significant differences (ONE WAY ANOVA) are indicated with \* P $\leq$ 0.05 and \*\* P $\leq$ 0.001.

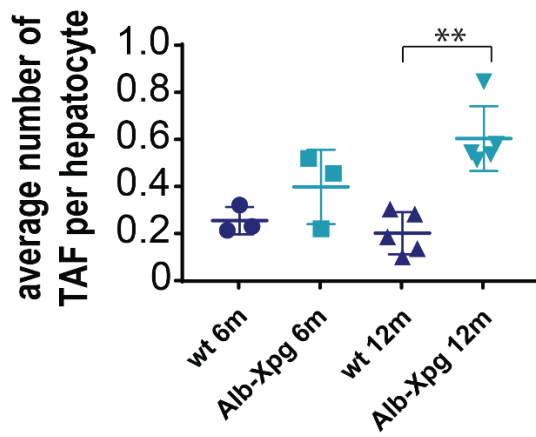

**Supplementary Figure 4: Hepatocyte specific senescence leads to fat accumulation in liver**

**a)** 6 (n=3) and 12 (n=5) months old *Alb-Xpg* mice show a significant increase in the average number of telomere associated foci (TAF) per hepatocyte.

All data are mean  $\pm$  SD 3-5 animals per group. Significant differences (ONE WAY ANOVA) are indicated with \*  $P \leq 0.05$  and \*\*  $P \leq 0.001$ .

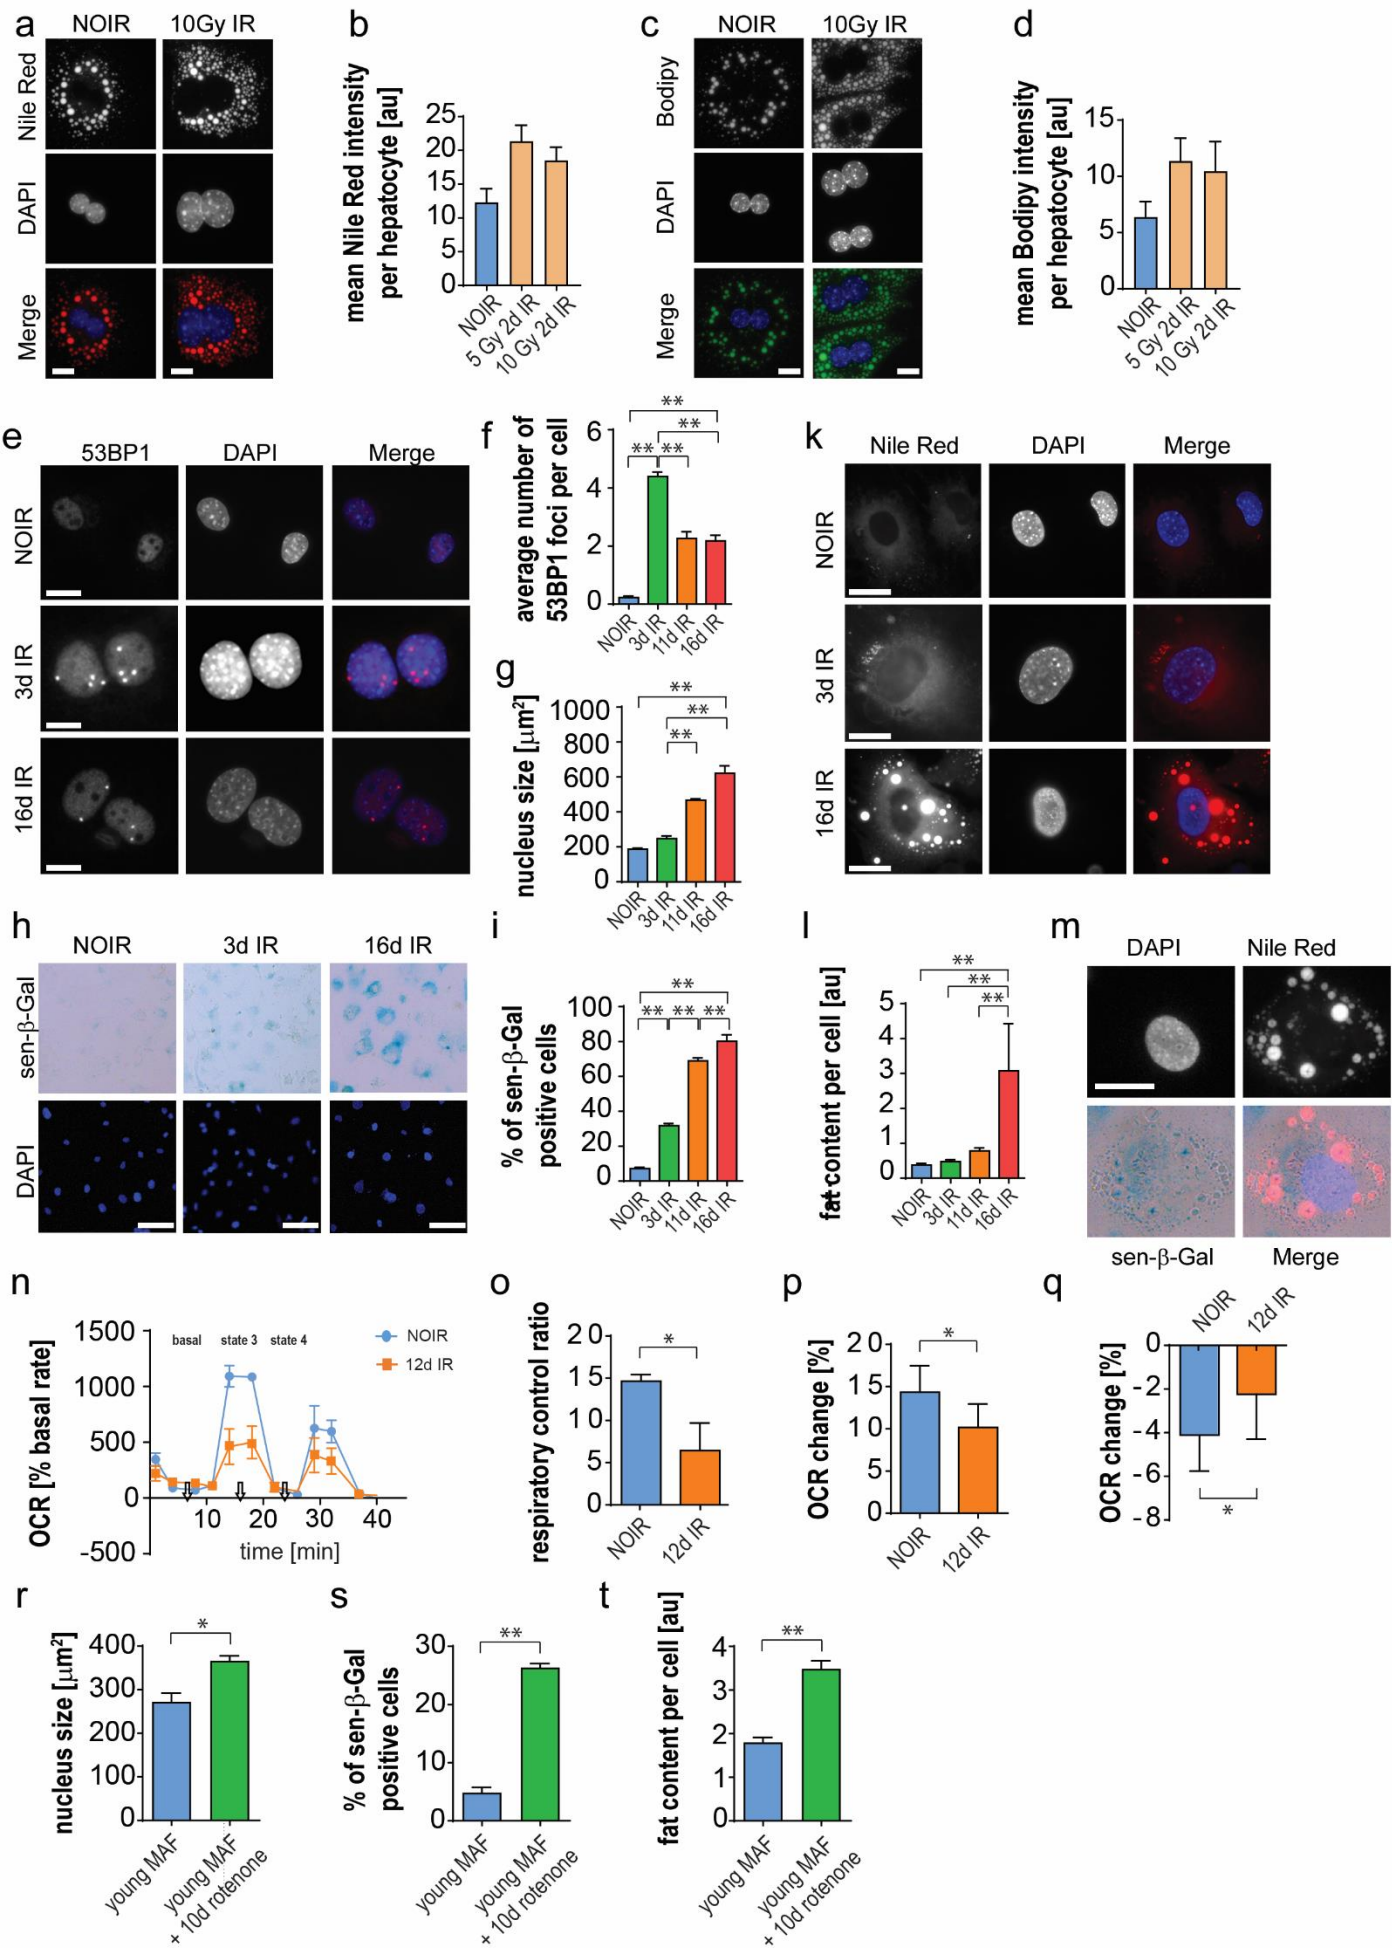

## Supplementary Figure 5: Induction of senescence causes mitochondrial dysfunction and reduces fatty acid oxidation capacity, resulting in fat accumulation in senescent cells

Fluorescent staining for Nile Red and BODIPY® 493/503 show similar staining patterns as well as a similar increase in staining after IR. **a, c**) Representative images showing Nile Red and BODIPY® 493/503 staining in hepatocytes after NOIR or 2 days after 5/10 Gy IR. (Merge: blue=DAPI, red=Nile Red (scale bar 20µm), green= BODIPY® 493/503 (scale bar 10µm), **b, d**) mean Nile red and BODIPY® 493/503 intensity show a similar increase in fat content per hepatocyte after IR. Mouse adult ear fibroblasts (MAF) acquire a senescent phenotype over one to two weeks after 10Gy IR: **e**) representative images showing 53BP1 DNA damage foci in non-irradiated MAFs (NOIR) and at 3 and 16 days after IR, Merge: blue=DAPI, red =53BP1 (scale bar=10µm), **f**) frequencies of 53BP1 foci, **g**) nuclear size, **h**) representative images showing Sen-β-Gal staining in NOIR, 3 and 16 days after IR (scale bar=50µm), **i**) frequencies of Sen-β-Gal positive cells, **k**) Representative images showing Nile Red staining in NOIR, 3 and 16 days after IR. Merge: blue=DAPI, red =Nile Red, scale bar=20µm, **l**) Average fluorescent intensity of Nile Red staining in MAFs before and after irradiation. **m**) Sen-β-Gal positive MAF show accumulation of lipids (Merge: blue=DAPI, red=Nile Red, light blue=sen-β-Gal, scale bar=10µm), **n**) A representative experiment showing oxygen consumption rates (OCR) from permeabilised MAFs without irradiation or at 12 days after IR, **o**) Respiratory control ratios were calculated as OCR at state 3 (in the presence of ADP) divided by state 4 (in the presence of oligomycin). **p**) Change in OCR after addition of the fatty acid palmitate as substrate, **q**) Change in OCR after inhibition of fatty acid oxidation by etomoxir. MAF were treated with rotenone (100nM) for 10days and showed an increase **r**) in nucleus size, **s**) the percentage of Sen-β-Gal positive cells and **t**) in the average fluorescence intensity of Nile Red staining.

Data b, d, i, r-t are mean ± SEM and f-l, n-q are SD with 3-4 animals per group. Significant differences (ONE WAY ANOVA) are indicated with \* P≤0.05 and \*\* P≤0.001.

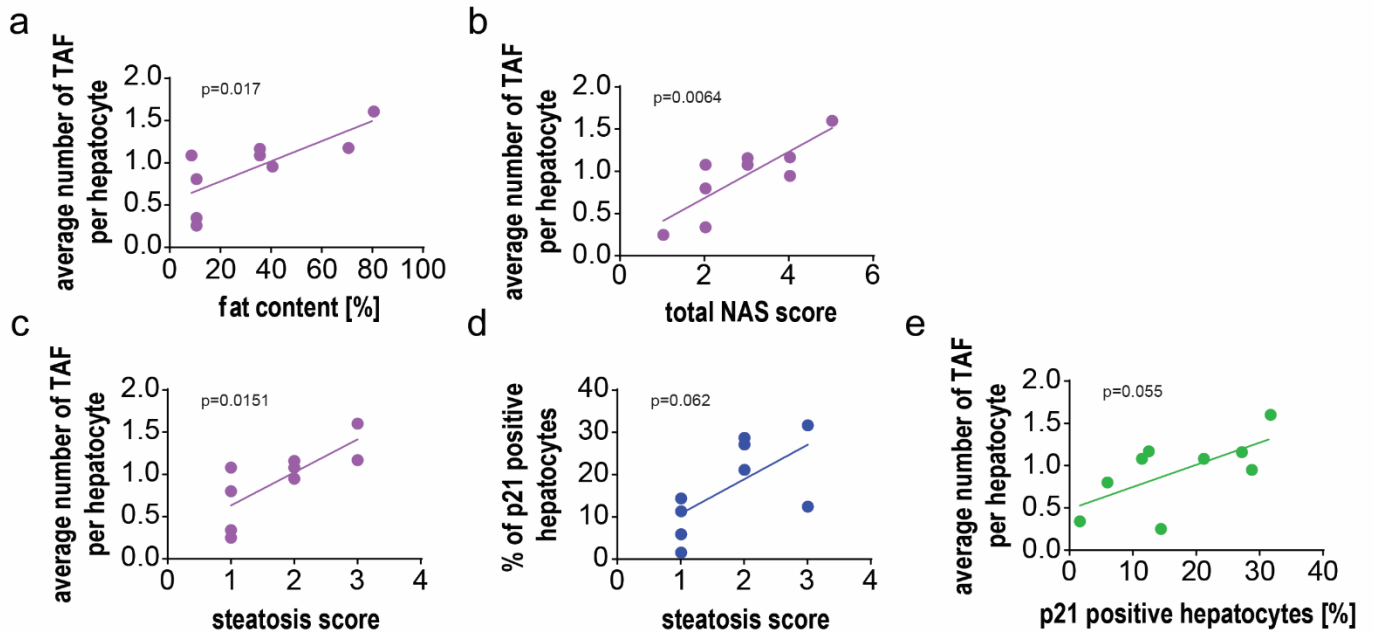

**Supplementary Figure 6: Correlations between additional senescence markers and NAFLD scores in patients.**

Markers of senescence increase with NAFLD score. **a)** Correlation between the average number of TAF per hepatocyte and fat content ( $R^2=0.5805$ ) **b)** Correlation between the average number of TAF per hepatocyte and NAS score ( $R^2=0.6778$ ), **c)** Correlation between the average number of TAF per hepatocyte and steatosis score of NAFLD patients ( $R^2=0.5938$ ), **d)** weak correlation between frequency of p21 positive hepatocytes and steatosis score of NAFLD patients ( $R^2=0.4218$ ). **e)** Weak correlation between the average number of TAF per hepatocyte and frequency of p21 positive hepatocytes per patient ( $R^2=0.4287$ ).

All data are means (frequencies of TAF per hepatocyte, p21+ cells) or scores per patient,  $n=9$ .
